# Supplementary material for: Unexpected fluorescent behavior of a 4-amino-1,8-naphthalimide derived β-cyclodextrin: conformation analysis and sensing properties
Source: Royal Society of Chemistry journal article supplement (doi:10.1039/b902132a), 2009-01-01
Supplement: b902132a.pdf [file b902132a.pdf]

## Supporting Information

# Unexpected fluorescent behavior of an 4-amino-1,8-naphthalimide derived $\beta$ -cyclodextrin: Conformation analysis and sensing properties

*Cheng Zhong, Tong Mu, Lei Wang, Enqin Fu,\* and Jingui Qin*

Department of Chemistry, Hubei Key Laboratory on Organic and Polymeric Optoelectronic

Materials, Wuhan University, Wuhan 430072, PR China

[fueq@whu.edu.cn](mailto:fueq@whu.edu.cn)

### Contents

|                                                                               |           |
|-------------------------------------------------------------------------------|-----------|
| <b>1. Experimental procedures.....</b>                                        | <b>S2</b> |
| <b>2. Calculation of absorption spectra and transition dipole moment.....</b> | <b>S4</b> |
| <b>3. Molecule modeling results.....</b>                                      | <b>S5</b> |
| <b>4. Additional fluorescence spectral data.....</b>                          | <b>S6</b> |
| <b>5. Additional NMR data.....</b>                                            | <b>S8</b> |

## 1. Experimental procedures

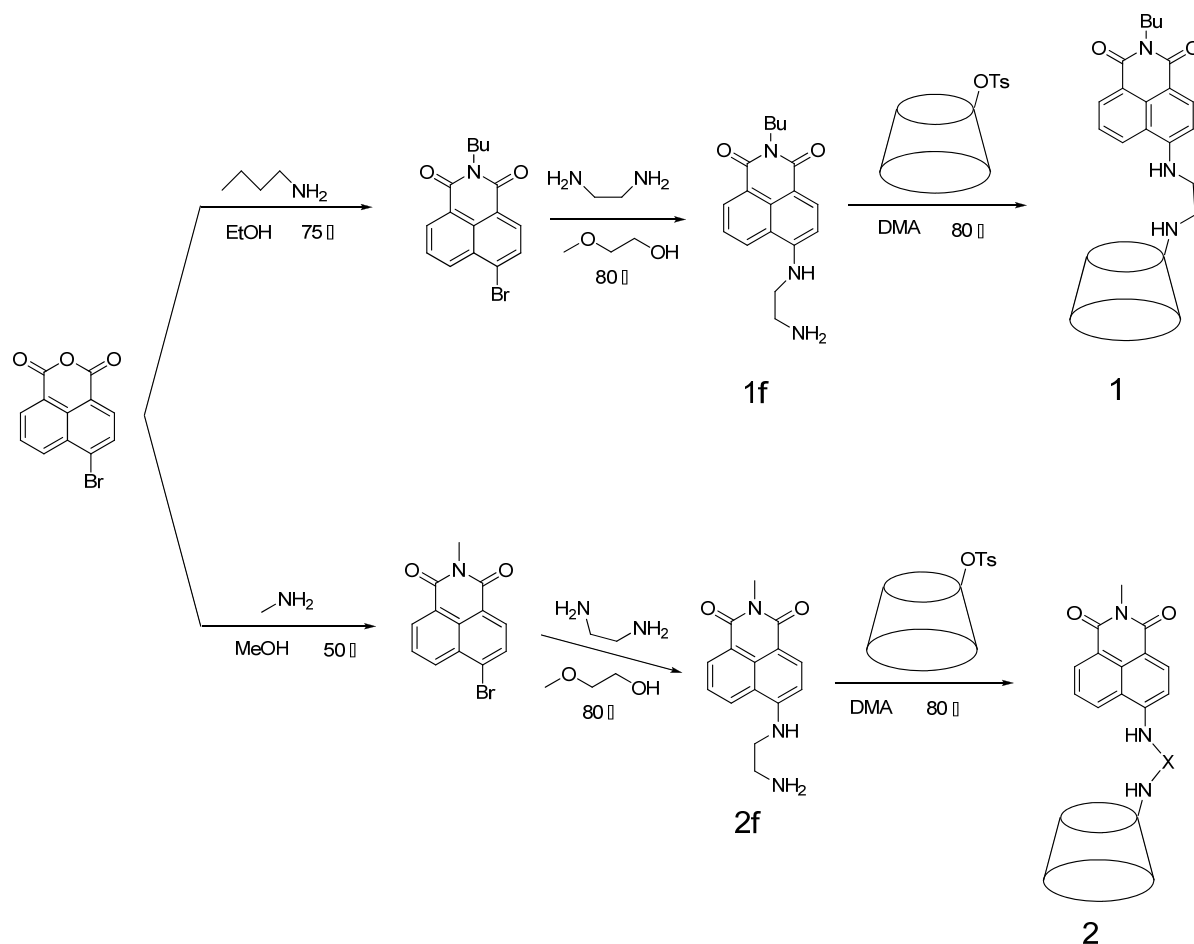

Scheme S1. Synthetic route for **1**, **2**

### 1-1. Synthesis of **1** and **2**

**1f**, **2f** These compounds were prepared according to the literature<sup>1,2</sup>.

**6-O-p-Toluenesulfonyl-β-Cyclodextrin** This compound was prepared according to the literature<sup>3</sup>.

**Compound 1** 1 g (3.22 mmol) N-butyl-4-(2-aminoethylamino)-1, 8-naphthalimide was added to 6 mL DMF solution containing 2 g (1.55 mmol) 6-O-p-Toluenesulfonyl-β-Cyclodextrin. The resulting solution was stirred for 6 h at 80 °C and cooled to room temperature. Afterward, the solution was added to 200 mL acetone dropwise to form precipitates. The precipitates were collected, washed with acetone followed by ether, and dried in vacuum. The product was dissolved in water and the solution was layered on a column packed with YMC GEL ODS-A (2.5 x 10 cm, pre-equilibrated

with water). Step gradient elution (5, 10, 15, 20 and 25% EtOH containing 1% hydrochloric acid) was applied. The title compound was eluted at 20%-25% EtOH. The fractions containing **1** were combined and further purified and desalted on a SP Sephadex C-25 column with 1M aqueous ammonia as eluent. After drying in vacuo, a pure sample was obtained in 15% yield. MS (ESI):  $m/z$  1428.5 ( $[M+H]^+$ ).  $^1H$  NMR (DMSO- $d_6$ , 300 MHz, TMS, ppm):  $\delta$  0.91 (t, 3H), 1.29-1.36 (m, 2H), 1.55-1.58 (m, 2H), 3.0-4.0 (m, 48H), 4.52 (s, 6H), 4.83-4.90 (m, 7H), 5.60-5.90 (m, 14H), 6.85 (d, 1H), 7.69 (t, 1H), 8.28 (d, 1H), 8.44 (d, 1H), 8.68 (d, 1H). Anal. Calcd for  $C_{60}H_{89}N_3O_{36} \cdot 5H_2O$ : C, 47.46; H, 6.57; N, 2.77%. Found: C, 47.52; H, 6.78; N, 2.71%.

**Compounds 2** was synthesized in the same manner as that for **1** from 6-Ts- $\beta$ -CD and fluorophore 2f. MS (ESI):  $m/z$  1386.5 ( $[M+H]^+$ ).  $^1H$  NMR (DMSO- $d_6$ , 300 MHz, TMS, ppm):  $\delta$  3.1-3.9 (m, 46H), 3.97 (s, 3H), 4.5-4.7 (m, 6H), 4.7-5.0 (m, 7H), 5.60-5.90 (m, 14H), 6.88 (d, 1H), 7.69 (t, 1H), 8.29 (d, 1H), 8.44 (d, 1H), 8.67 (d, 1H). Anal. Calcd for  $C_{57}H_{83}N_3O_{36} \cdot 6H_2O$ : C, 45.81; H, 6.41; N, 2.81%. Found: C, 45.86; H, 6.38; N, 2.95%.

## 1-2. Spectroscopic Measurements

2D NOESY NMR spectra were obtained with  $D_2O$  as the solvent at 10 °C on a 400 MHz Bruker Avance-400 spectrometer. Chemical shifts were referenced to the solvent values. Fluorescence spectra were recorded on a HITACHI FL-4500 spectrofluorometer (1-cm quartz cell used), and excitation wavelength was set at 450 nm. The Circular dichroism spectra and UV spectra were recorded on a JASCO J810 spectrometer in water with 1 cm cell at 10 °C.

## 2. Calculation of absorption spectra and transition dipole moment

The geometrical and electronic properties of the compounds were performed with the Gaussian 03 program package<sup>4</sup>

1. Optimization of the ground-state geometry at the DFT B3LYP/6-31G+(d) level of theory
2. Determination of the vertical electronic excitation energies and direction of transition dipole moment using the TD-DFT B3LYP/6-31G+(d) framework with PCM (polarized continuum model) as solvation model

Table S1 Excitation energies and oscillator strengths of the molecules calculated with TDDFT

| Absorption wavelength ( $\lambda$ ) | oscillator strengths (f) | Experiment result ( $\lambda$ ) |
|-------------------------------------|--------------------------|---------------------------------|
| 251nm                               | 0.2272                   | 256nm                           |
| 273nm                               | 0.2457                   | 284nm                           |
| 279nm                               | 0.2225                   |                                 |
| 421nm                               | 0.2812                   | 450nm                           |

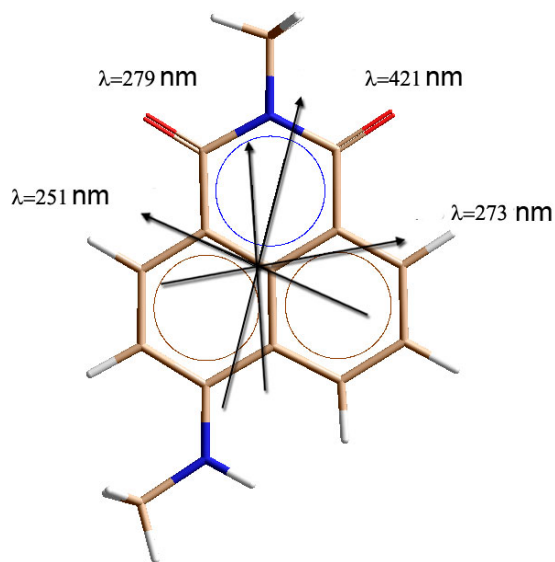

Figure S2-1 illustration of calculated direction of transition dipole moment

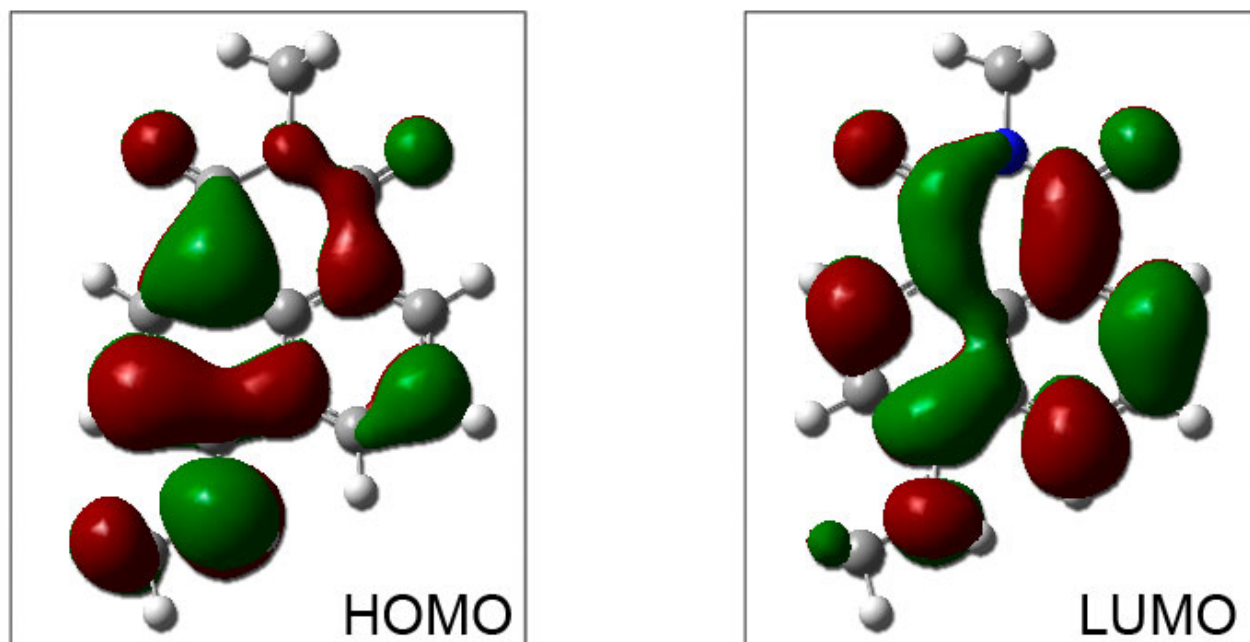

Figure S2-2 HOMO (left) and LUMO (right) computed on the ground state geometry with the PCM(water)-DFT B3LYP/6-31G+(d) scheme.

### 3. Molecular modeling results

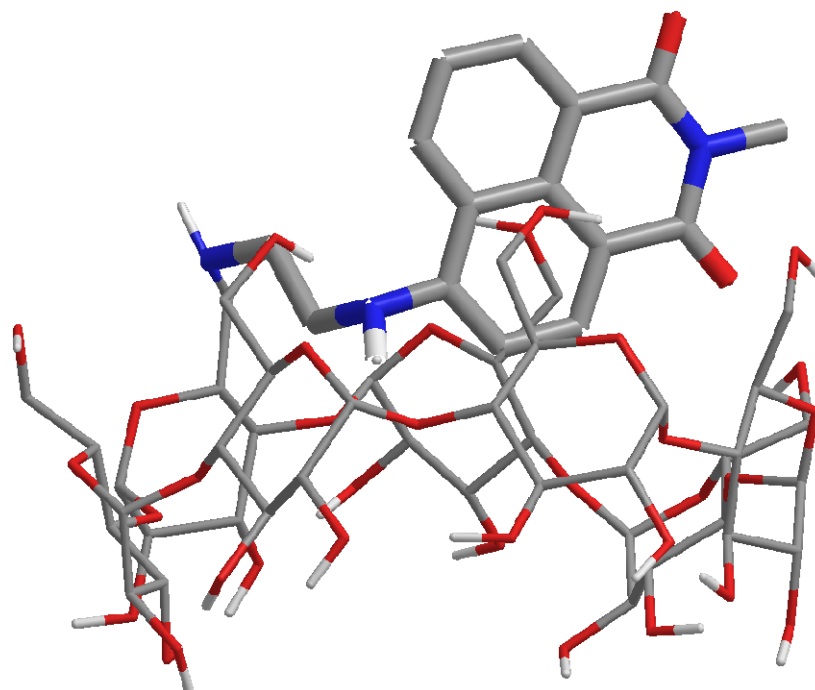

Figure S3-1 Molecular modeling of **2** derived from 2D NOESY NMR and energy minimization with amber force field calculation.

#### 4. Additional fluorescence spectral data

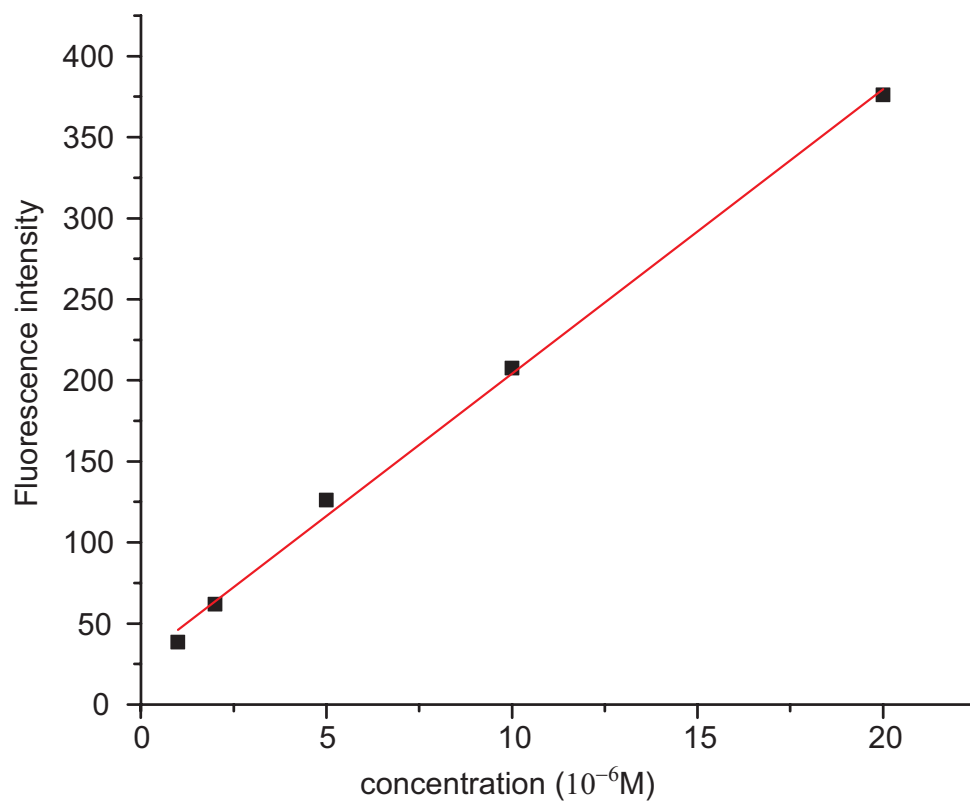

**Figure S4-1** Fluorescence intensity at 530nm of compound **1** at various concentrations (1, 2, 5, 10, 20  $\mu\text{M}$ )

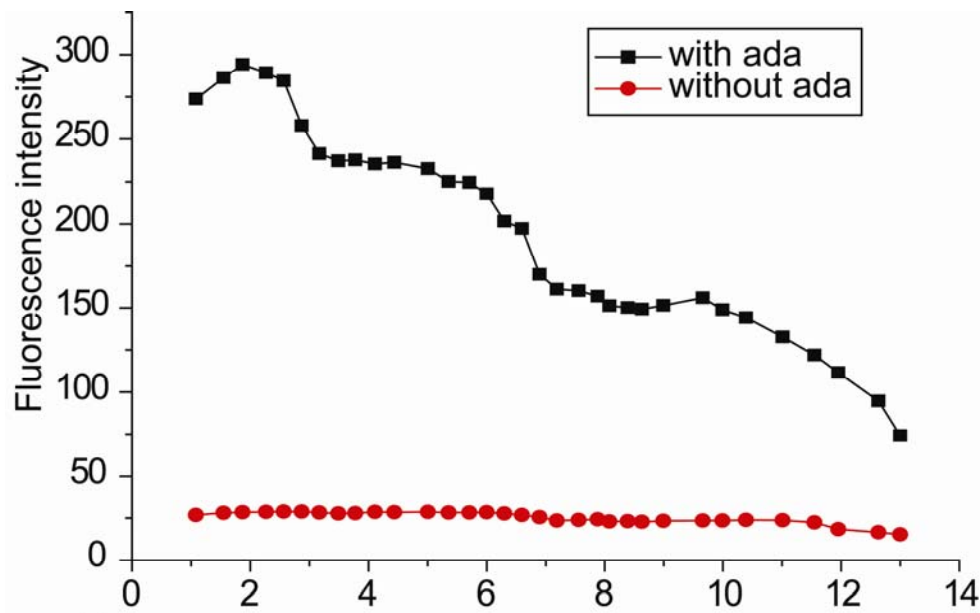

**Figure S4-2.** pH dependency of the fluorescence intensities and fluorescence maximum of **1** alone (10  $\mu$ M) and in the presence of adamantane-1-carboxylate (200  $\mu$ M).

As shown in Fig. S4-2, the fluorescence of compound **1** is enhanced upon addition of the guest molecule at various pH values. Which suggest this behavior is not caused by the change of protonation degree of the ethylenediamine chain.

## 5. Additional NMR data

mixing time = 50 ms

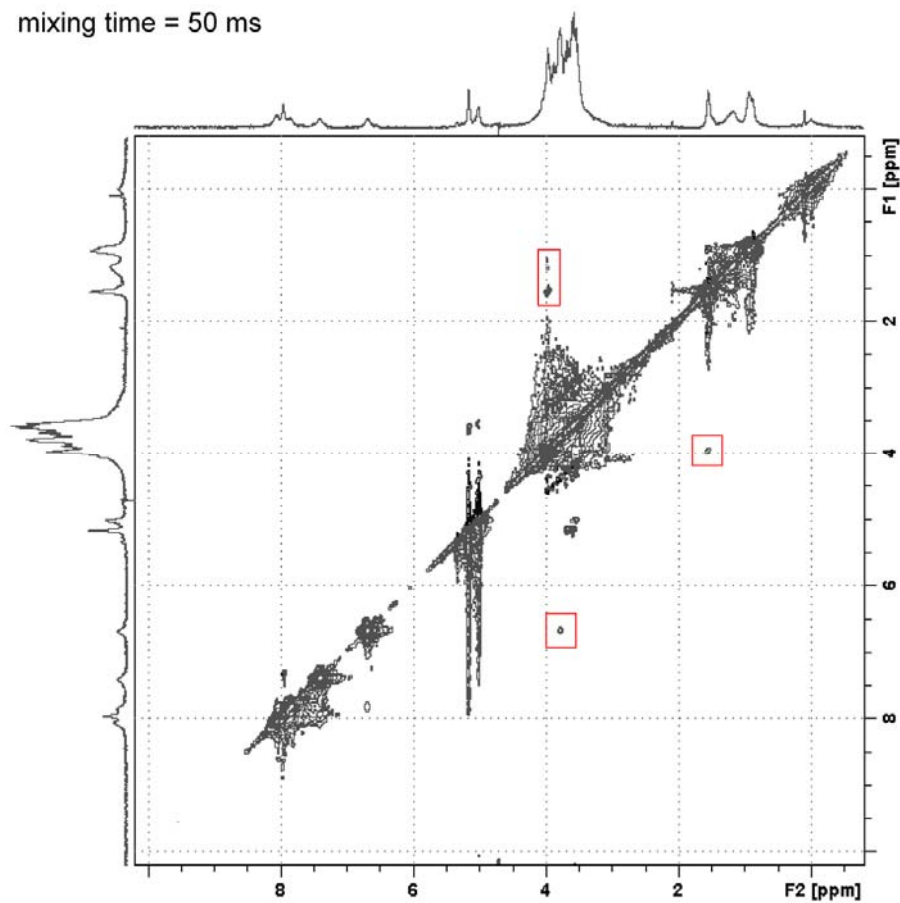

mixing time = 200 ms

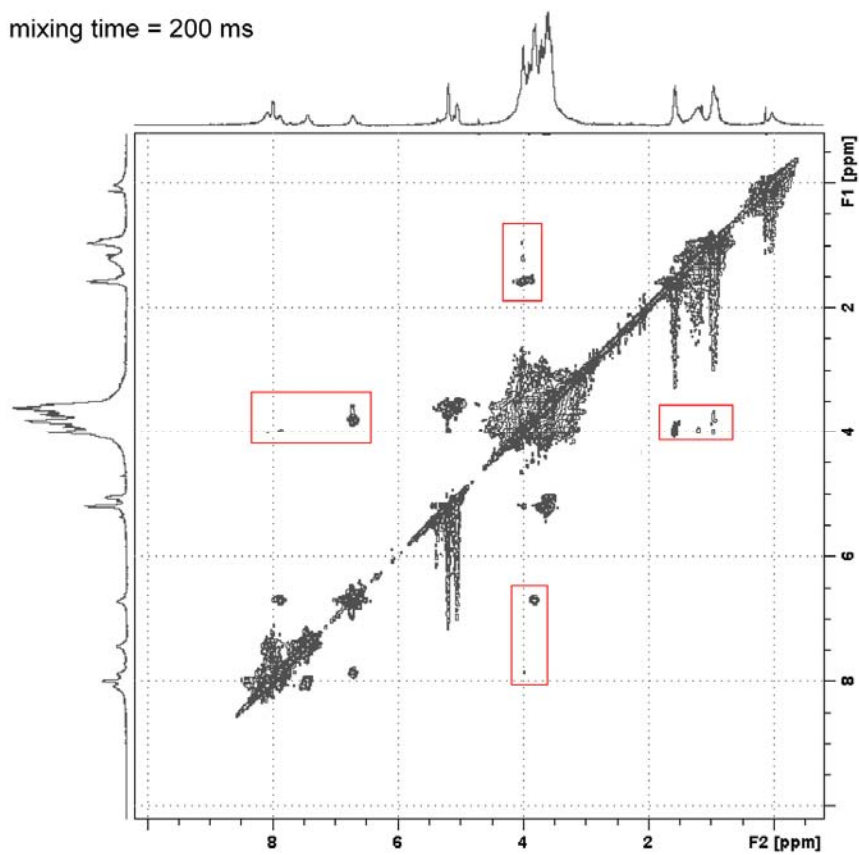



mixing time = 400 ms

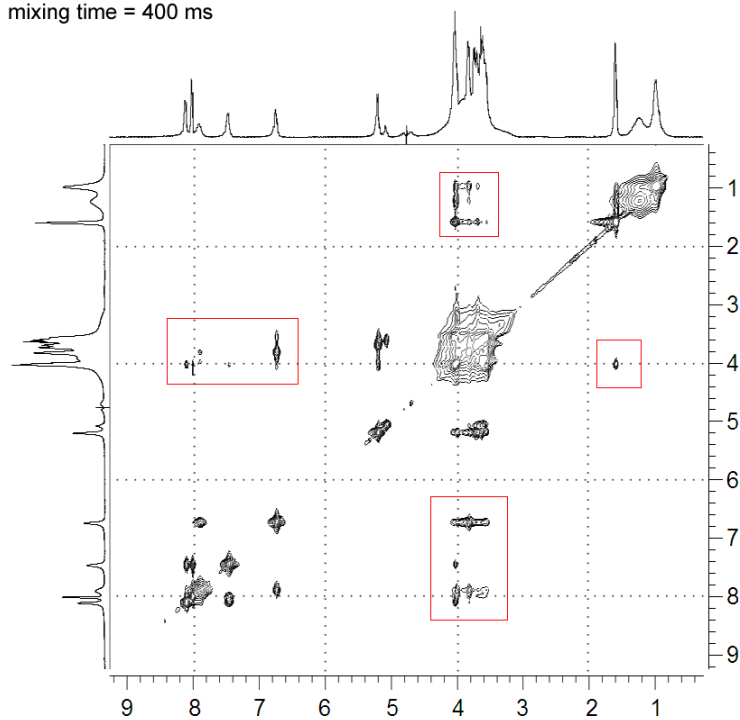

ROESY

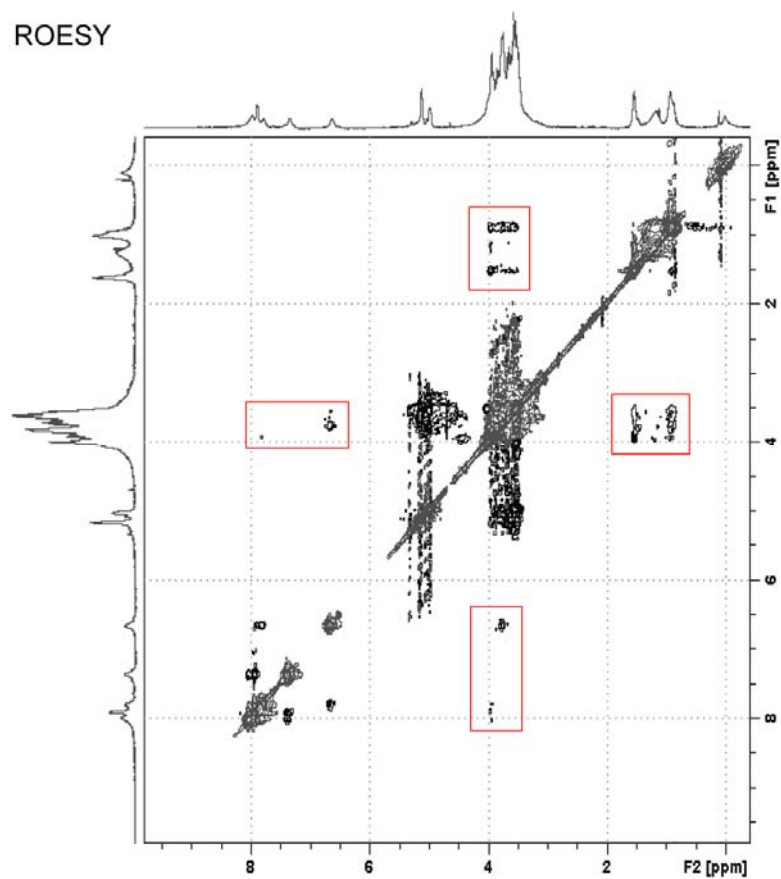

**Figure S5-1** 400MHz 2D NOESY NMR spectrum with water suppression of **1** in D<sub>2</sub>O with mixing time of 50 msec (first), 200 msec (second), 400 msec (third) and 400MHz 2D ROESY NMR spectrum with water suppression of **1** in D<sub>2</sub>O (fourth).

## reference

- (1) Elbert, J. E.; Paulsen, S.; Robinson, L.; Elzey, S.; Klein, K. *J. Photochem. Photobiol., A* **2004**, *169*, 9-19.
- (2) Fan, J.; Peng, X.; Wu, Y.; Lu, E.; Hou, J.; Zhang, H.; Zhang, R.; Fu, X. *J. Lumin.* **2005**, *114*, 125-130.
- (3) Brady, B.; Lynam, N.; O'Sullivan, T.; Ahern, C.; Darcy, R. *Org. Synth.* **2000**, *77*, 220-224.
- (4) Frisch, M. J.; Trucks, G. W.; Schlegel, H. B.; Scuseria, G. E.; Robb, M. A.; Cheeseman, J. R.; Montgomery, J. A., Jr.; Vreven, T.; Kudin, K.N.; Burant, J. C.; Millam, J. M.; Iyengar, S. S.; Tomasi, J.; Barone, V.; Mennucci, B.; Cossi, M.; Scalmani, G.; Rega, N.; Petersson, G. A.; Nakatsuji, H.; Hada, M.; Ehara, M.; Toyota, K.; Fukuda, R.; Hasegawa, J.; Ishida, M.; Nakajima, T.; Honda, Y.; Kitao, O.; Nakai, H.; Klene, M.; Li, X.; Knox, J. E.; Hratchian, H. P.; Cross, J. B.; Adamo, C.; Jaramillo, J.; Gomperts, R.; Stratmann, R. E.; Yazyev, O.; Austin, A. J.; Cammi, R.; Pomelli, C.; Ochterski, J. W.; Ayala, P. Y.; Morokuma, K.; Voth, G. A.; Salvador, P.; Dannenberg, J. J.; Zakrzewski, V. G.; Dapprich, S.; Daniels, A. D.; Strain, M. C.; Farkas, O.; Malick, D. K.; Rabuck, A. D.; Raghavachari, K.; Foresman, J. B.; Ortiz, J. V.; Cui, Q.; Baboul, A. G.; Clifford, S.; Cioslowski, J.; Stefanov, B. B.; Liu, G.; Liashenko, A.; Piskorz, P.; Komaromi, I.; Martin, R. L.; Fox, D. J.; Keith, T.; Al-Laham, M. A.; Peng, C. Y.; Nanayakkara, A.; Challacombe, M.; Gill, P. M. W.; Johnson, B.; Chen, W.; Wong, M. W.; Gonzalez, C.; Pople, J. A. Gaussian 03, revision E.01; Gaussian, Inc.: Wallingford, CT, 2004.
